# Supplementary material for: Hg3O2(NO3)F: a mercury nitrate oxyfluoride with an unprecedented [(Hg3O2F)+]∞cationic framework and excellent optical anisotropy
Source: Royal Society of Chemistry journal article supplement (doi:10.1039/d3qi01146a), 2023-01-01
Supplement: d3qi01146a1.pdf [file d3qi01146a1.pdf]

## *Supporting Information (SI)*

### **Hg<sub>3</sub>O<sub>2</sub>(NO<sub>3</sub>)F: A mercury nitrate oxyfluoride with unprecedented [(Hg<sub>3</sub>O<sub>2</sub>F)<sup>+</sup>]<sub>∞</sub> cationic framework and excellent optical anisotropy**

Yi-Lei Lv,<sup>a</sup> Lei Huai,<sup>a</sup> Yu-Long Wei,<sup>a</sup> Liang Ma,<sup>a</sup> Yue-Qi Wei,<sup>a</sup> Wenlong Liu,<sup>a</sup> Ru-Ling Tang<sup>\*a,b</sup>

*a. School of Chemistry and Chemical Engineering, Yangzhou University, Yangzhou, Jiangsu 225002, P. R. China.*

*b. State Key Laboratory of Structural Chemistry, Fujian Institute of Research on the Structure of Matter, Chinese Academy of Sciences, Fuzhou, 350002, P. R. China.*

## **Supporting Information Index**

### **Tables and Figures**

**Table S1.** Important bond lengths (Å) and bond angles (°) for Hg<sub>3</sub>O<sub>2</sub>(NO<sub>3</sub>)F.

**Table S2.** Fractional Atomic Coordinates (×10<sup>4</sup>) and Equivalent Isotropic Displacement Parameters (Å<sup>2</sup>×10<sup>3</sup>) for Hg<sub>3</sub>O<sub>2</sub>(NO<sub>3</sub>)F.  $U_{eq}$  is defined as 1/3 of the trace of the orthogonalized  $U_{ij}$  tensor.

**Table S3.** The reported inorganic nitrate halides.

**Table S4.** The birefringence of some Hg-based compounds.

**Figure S1.** The crystal structure of Hg<sub>3</sub>O<sub>2</sub>(NO<sub>3</sub>)<sub>2</sub>.

**Figure S2.** Theoretical calculations of Hg<sub>3</sub>O<sub>2</sub>(NO<sub>3</sub>)<sub>2</sub>.

**Figure S3.** The arrangements of NO<sub>3</sub> groups in Hg<sub>3</sub>O<sub>2</sub>(NO<sub>3</sub>)F (a) and Hg<sub>3</sub>O<sub>2</sub>(NO<sub>3</sub>)<sub>2</sub> (b).

**Figure S4.** EDS images and results of Hg<sub>3</sub>O<sub>2</sub>(NO<sub>3</sub>)F.

**Table S1.** Important bond lengths (Å) and bond angles (°) for Hg<sub>3</sub>O<sub>2</sub>(NO<sub>3</sub>)F.

| <b>Bond Length(Å)</b>                      |           |                               |            |
|--------------------------------------------|-----------|-------------------------------|------------|
| Hg(1)–O(1) <sup>1</sup>                    | 2.121(5)  | Hg(2)–O(1) <sup>5</sup>       | 2.067(4)   |
| Hg(1)–O(1)                                 | 2.121(5)  | Hg(2) <sup>3</sup> –O(1)      | 2.067(4)   |
| Hg(1)–F(1)                                 | 2.383(5)  | Hg(1) <sup>6</sup> –F(1)      | 2.328(6)   |
| Hg(1)–F(1) <sup>4</sup>                    | 2.328(6)  | N(1)–O(2)                     | 1.253(11)  |
| Hg(1) <sup>1</sup> –O(1)                   | 2.121(5)  | N(1)–O(3)                     | 1.249(10)  |
| Hg(1) <sup>1</sup> –F(1)                   | 2.383(5)  | N(1)–O(4)                     | 1.254(9)   |
| <b>Bond Angles (deg)</b>                   |           |                               |            |
| O(1) <sup>1</sup> –Hg(1)–O(1)              | 177.7(2)  | F(1) <sup>4</sup> –Hg(1)–F(1) | 133.47(13) |
| F(1) <sup>4</sup> –Hg(1)–O(1)              | 90.46(12) | O(1)–Hg(2)–O(1) <sup>5</sup>  | 169.52     |
| F(1)–Hg(1)–O(1)                            | 88.90(11) | O(2)–N(1)–O(4)                | 119.6(11)  |
| F(1)–Hg(1)–O(1) <sup>1</sup>               | 88.90(11) | O(3)–N(1)–O(2)                | 120.2(12)  |
| F(1) <sup>4</sup> –Hg(1)–O(1) <sup>1</sup> | 90.46(12) | O(3)–N(1)–O(4)                | 120.1(12)  |

<sup>1</sup>+X,1/2-Y,+Z; <sup>2</sup>1/2-X,-1/2+Y,1/2+Z; <sup>3</sup>1/2-X,1-Y,1/2+Z; <sup>4</sup>1/2+X,+Y,3/2-Z; <sup>5</sup>1/2-X,1-Y,-1/2+Z; <sup>6</sup>-1/2+X,+Y,3/2-z

**Table S2.** Fractional Atomic Coordinates ( $\times 10^4$ ) and Equivalent Isotropic Displacement Parameters ( $\text{\AA}^2 \times 10^3$ ) for N Hg<sub>3</sub>O<sub>2</sub>(NO<sub>3</sub>)F.  $U_{\text{eq}}$  is defined as 1/3 of the trace of the orthogonalized  $U_{ij}$  tensor.

| atom  | Wyckoff site | $x$       | $y$       | $z$       | $U_{\text{eq}}/\text{\AA}^2$ |
|-------|--------------|-----------|-----------|-----------|------------------------------|
| Hg(1) | 4c           | 3676.6(4) | 2500      | 6318.7(4) | 10.51(12)                    |
| Hg(2) | 8d           | 2701.8(4) | 5096.5(2) | 3832.9(3) | 12.48(11)                    |
| O(1)  | 8d           | 3659(6)   | 4430(4)   | 6378(5)   | 10.9(10)                     |
| F(1)  | 4c           | 1745(7)   | 2500      | 9015(8)   | 19.6(13)                     |
| N(1)  | 8d           | 4557(10)  | 2488(12)  | 11280(9)  | 15.2(16)                     |
| O(2)  | 8d           | 4793(16)  | 1372(9)   | 11020(18) | 28(3)                        |
| O(3)  | 8d           | 5201(16)  | 3243(11)  | 10139(15) | 29(3)                        |
| O(4)  | 8d           | 3588(13)  | 2839(8)   | 12629(12) | 29(3)                        |

**Table S3.** The reported inorganic nitrate halides. (“—” means no concrete data)

|    | Compounds                                                                                     | Space group  | Dimension | Birefringence |
|----|-----------------------------------------------------------------------------------------------|--------------|-----------|---------------|
| 1  | $\text{Cs}_2\text{Pb}(\text{NO}_3)_2\text{Br}_2$                                              | $I4_1/amd$   | 1D        | 0.147@546 nm  |
| 2  | $\text{PbCdF}(\text{SeO}_3)(\text{NO}_3)$                                                     | $Pca2_1$     | 2D        | 0.055@1064nm  |
| 3  | $\text{Pb}_2(\text{NO}_3)_2(\text{H}_2\text{O})\text{F}_2$                                    | $Amm2$       | 3D        | 0.230@1064nm  |
| 4  | $\text{CsHgNO}_3\text{Cl}_2$                                                                  | $P6_3/mmc$   | 2D        | 0.145@546 nm  |
| 5  | $\text{Rb}_2\text{SbF}_3(\text{NO}_3)_2$                                                      | $P2_1$       | 3D        | 0.06@1064nm   |
| 6  | $\text{RbSnF}_2\text{NO}_3$                                                                   | $C2/m$       | 3D        | 0.05@1064nm   |
| 7  | $(\text{NH}_4)_3\text{SbF}_3(\text{NO}_3)_3$                                                  | $P2_1$       | 0D        | 0.098@546nm   |
| 8  | $(\text{NH}_4)_3\text{SbF}_4(\text{NO}_3)_2$                                                  | $Pnma$       | 0D        | 0.164@546nm   |
| 9  | $\text{Na}_3\text{Rb}_6(\text{CO}_3)_3(\text{NO}_3)_2\text{Cl}\cdot(\text{H}_2\text{O})_6$    | $P6_3/mcm$   | 3D        | 0.14 @ 546 nm |
| 10 | $\text{Cs}_2\text{PbCl}_2(\text{NO}_3)_2$                                                     | $I4_1/amd$   | 2D        | —             |
| 11 | $(\text{NH}_4)_2\text{SiF}_6\cdot\text{NH}_4\text{NO}_3$                                      | $P6_3/mmc$   | 0D        | —             |
| 12 | $(\text{NH}_4)_2\text{Sn}_2\text{F}_4(\text{NO}_3)_2$                                         | $C2$         | 0D        | —             |
| 13 | $[\text{((NH}_3)_5\text{Co)}_2\text{O}_2](\text{NO}_3)_2\text{Cl}_3\cdot 2\text{H}_2\text{O}$ | $Pnmm$       | 0D        | —             |
| 14 | $\text{Ag}_2\text{ClNO}_3$                                                                    | $Pnma$       | 3D        | —             |
| 15 | $\text{Ag}_2\text{INO}_3$                                                                     | $P2_12_12_1$ | 3D        | —             |
| 16 | $\text{CaClNO}_3\cdot 2\text{H}_2\text{O}$                                                    | $Pbca$       | 2D        | —             |
| 17 | $\text{HgINO}_3$                                                                              | $Pnma$       | 2D        | —             |
| 18 | $\text{K}_2\text{SbF}_3(\text{NO}_3)_2\cdot\text{KNO}_3$                                      | $Cmc2_1$     | 3D        | —             |
| 19 | $\text{NaSbF}_3\text{NO}_3\cdot\text{H}_2\text{O}$                                            | $Pbca$       | 2D        | —             |
| 20 | $\text{Pb}_3\text{F}_5\text{NO}_3$                                                            | $P\bar{1}$   | 2D        | —             |
| 21 | $\text{Rb}_3\text{CoCl}_4\text{NO}_3$                                                         | $Pnma$       | 3D        | —             |
| 22 | $\text{Cs}_3\text{Sb}_2\text{F}_6(\text{NO}_3)_3$                                             | $C2/c$       | 3D        | —             |
| 23 | $\text{K}_3\text{Sb}_2\text{F}_7(\text{NO}_3)_2$                                              | $C2/c$       | 3D        | —             |
| 24 | $\text{K}_4\text{Sb}_2\text{F}_6(\text{NO}_3)_3$                                              | $Pbcn$       | 3D        | —             |
| 25 | $\text{Rb}_4\text{Sb}_2\text{F}_6(\text{NO}_3)_4$                                             | $P2_1$       | 3D        | —             |
| 26 | $\text{RbTeF}_4(\text{NO}_3)$                                                                 | $P1$         | 3D        | —             |
| 27 | $\text{RbTeF}_4(\text{NO}_3)$                                                                 | $P\bar{1}$   | 3D        | —             |
| 28 | $\text{Co}(\text{NH}_3)_5\text{NO}_2\text{Cl}(\text{NO}_3)$                                   | $Pna2_1$     | 0D        | —             |
| 29 | $\text{KBiCl}_3(\text{NO}_3)$                                                                 | $P2_1/c$     | 3D        | —             |
| 30 | $\text{Ag}_3\text{I}(\text{NO}_3)_2$                                                          | $P2_12_12_1$ | 3D        | —             |
| 31 | $\text{Ag}_2\text{HgI}_2(\text{NO}_3)_2\cdot\text{H}_2\text{O}$                               | $Pbam$       | 3D        | —             |

|    |                                                                                                         |                   |    |   |
|----|---------------------------------------------------------------------------------------------------------|-------------------|----|---|
| 32 | $\text{KSbF}_3\text{NO}_3$                                                                              | <i>Pbca</i>       | 2D | — |
| 33 | $(\text{NH}_4)_2(\text{HF}_2)(\text{NO}_3)$                                                             | <i>Pmc2_1</i>     | 0D | — |
| 34 | $\text{K}_3(\text{HF}_2)(\text{NO}_3)_2$                                                                | <i>Pbam</i>       | 0D | — |
| 35 | $\text{Rb}_3\text{SbF}_3(\text{NO}_3)_3$                                                                | <i>P2_1</i>       | 3D | — |
| 36 | $\text{Cs}_3\text{Ml}_4\text{NO}_3$ (M = Zn, Co, Cd)                                                    | <i>Pnma</i>       | 3D | — |
| 37 | $\text{K}_3\text{ZnCl}_4\text{NO}_3$                                                                    | <i>Pnma</i>       | 3D | — |
| 38 | $[(\text{UO}_2)_4\text{F}_{13}][\text{Sr}_3(\text{H}_2\text{O})_8](\text{NO}_3)\cdot\text{H}_2\text{O}$ | $P\bar{1}$        | 2D | — |
| 39 | $\text{K}_2\text{TeF}_5\text{NO}_3$                                                                     | <i>P4/nmm</i>     | 3D | — |
| 40 | $\text{K}_2\text{SiF}_6\cdot\text{KNO}_3$                                                               | <i>P6_3/mmc</i>   | 2D | — |
| 41 | $\text{Cs}_3((\text{Sn}_3\text{F}_6)_2\text{H})(\text{NO}_3)_4$                                         | $P\bar{1}$        | 2D | — |
| 42 | $\text{Cu}_{36.6}\text{Cl}_{6.7}(\text{NO}_3)_{2.6}(\text{OH})_{63.9}\cdot 2.1\text{H}_2\text{O}$       | <i>P6_3/mmc</i>   | 3D | — |
| 43 | $(\text{OsNO}(\text{NH}_3)_4\text{NO}_3)\text{Cl}_2\cdot 0.5(\text{H}_2\text{O})$                       | <i>C2/c</i>       | 0D | — |
| 44 | $[\text{Rb}_2\text{Cd}(\text{Cl})(\text{NO}_3)(\text{C}_2\text{O}_4)(\text{H}_2\text{O})]$              | <i>Pbca</i>       | 3D | — |
| 45 | $\text{Ag}_2\text{BrNO}_3$                                                                              | <i>Pnma</i>       | 3D | — |
| 46 | $\text{BrNO}_3$                                                                                         | <i>P2_12_12_1</i> | 0D | — |

**Table S4.** The birefringence of some Hg-based compounds.

| Compounds <sup>↵</sup>                                                           | Space group <sup>↵</sup>               | Hg polyhedra <sup>↵</sup>                                         | Birefringence <sup>↵</sup>  |
|----------------------------------------------------------------------------------|----------------------------------------|-------------------------------------------------------------------|-----------------------------|
| Ba <sub>2</sub> HgTe <sub>5</sub> <sup>↵</sup>                                   | <i>Pnma</i> <sup>↵</sup>               | HgTe <sub>2</sub> <sup>↵</sup>                                    | 0.643@2090 nm <sup>↵</sup>  |
| HgB <sub>2</sub> S <sub>4</sub> <sup>↵</sup>                                     | <i>P2<sub>1</sub>/n</i> <sup>↵</sup>   | HgS <sub>2</sub> <sup>↵</sup>                                     | 0.52@1064nm <sup>↵</sup>    |
| HgS <sup>↵</sup>                                                                 | <i>P3<sub>2</sub>21</i> <sup>↵</sup>   | HgS <sub>2</sub> <sup>↵</sup>                                     | 0.29@2100nm <sup>↵</sup>    |
| BaHgGeSe <sub>4</sub> <sup>↵</sup>                                               | <i>Ama2</i> <sup>↵</sup>               | HgSe <sub>4</sub> <sup>↵</sup>                                    | 0.27@2090 nm <sup>↵</sup>   |
| EuHgGeS <sub>4</sub> <sup>↵</sup>                                                | <i>Ama2</i> <sup>↵</sup>               | HgS <sub>4</sub> <sup>↵</sup>                                     | 0.25@2090 nm <sup>↵</sup>   |
| Cs <sub>2</sub> HgI <sub>2</sub> Cl <sub>2</sub> <sup>↵</sup>                    | <i>P2<sub>1</sub></i> <sup>↵</sup>     | HgCl <sub>2</sub> I <sub>2</sub> <sup>↵</sup>                     | 0.198@1064nm <sup>↵</sup>   |
| Hg <sub>3</sub> (Te <sub>3</sub> O <sub>8</sub> )(SO <sub>4</sub> ) <sup>↵</sup> | <i>P2<sub>1</sub>/m</i> <sup>↵</sup>   | HgO <sub>5</sub> ,HgO <sub>7</sub> <sup>↵</sup>                   | 0.166@1064nm <sup>↵</sup>   |
| BaHgSe <sub>2</sub> <sup>↵</sup>                                                 | <i>Pmc2<sub>1</sub></i> <sup>↵</sup>   | HgSe <sub>3</sub> , HgSe <sub>2</sub> <sup>↵</sup>                | 0.1473@2090 nm <sup>↵</sup> |
| CsHgNO <sub>3</sub> Cl <sub>2</sub> <sup>↵</sup>                                 | <i>P6<sub>3</sub>/mmc</i> <sup>↵</sup> | HgO <sub>6</sub> Cl <sub>2</sub> <sup>↵</sup>                     | 0.145@546 nm <sup>↵</sup>   |
| CsHgClSO <sub>4</sub> ·H <sub>2</sub> O <sup>↵</sup>                             | <i>Pmmn</i> <sup>↵</sup>               | HgO <sub>5</sub> Cl <sup>↵</sup>                                  | 0.12@546 nm <sup>↵</sup>    |
| Hg <sub>3</sub> (SeO <sub>3</sub> ) <sub>2</sub> (SO <sub>4</sub> ) <sup>↵</sup> | <i>P2<sub>1</sub></i> <sup>↵</sup>     | HgO <sub>5</sub> ,HgO <sub>7</sub> ,HgO <sub>8</sub> <sup>↵</sup> | 0.118@546 nm <sup>↵</sup>   |
| CuHgPS <sub>4</sub> <sup>↵</sup>                                                 | <i>Pna2<sub>1</sub></i> <sup>↵</sup>   | HgS <sub>4</sub> <sup>↵</sup>                                     | 0.11@2090 nm <sup>↵</sup>   |
| AgHgPS <sub>4</sub> <sup>↵</sup>                                                 | <i>Pn</i> <sup>↵</sup>                 | HgS <sub>4</sub> <sup>↵</sup>                                     | 0.11@2090 nm <sup>↵</sup>   |
| Hg <sub>3</sub> O <sub>2</sub> SO <sub>4</sub> <sup>↵</sup>                      | <i>P3<sub>2</sub>21</i> <sup>↵</sup>   | HgO <sub>6</sub> <sup>↵</sup>                                     | 0.10@546 nm <sup>↵</sup>    |
| HgTeO <sub>2</sub> F(OH) <sup>↵</sup>                                            | <i>Pca2<sub>1</sub></i> <sup>↵</sup>   | HgO <sub>2</sub> <sup>↵</sup>                                     | 0.09@1064 nm <sup>↵</sup>   |
| BaHgS <sub>2</sub> <sup>↵</sup>                                                  | <i>Pmc2<sub>1</sub></i> <sup>↵</sup>   | HgS <sub>4</sub> , HgS <sub>2</sub> <sup>↵</sup>                  | 0.07@2090 nm <sup>↵</sup>   |
| LiHgPO <sub>4</sub> <sup>↵</sup>                                                 | <i>P4̄21m</i> <sup>↵</sup>             | HgO <sub>6</sub> <sup>↵</sup>                                     | 0.068@1064 nm <sup>↵</sup>  |
| Hg <sub>3</sub> P <sub>2</sub> S <sub>8</sub> <sup>↵</sup>                       | <i>Aba2</i> <sup>↵</sup>               | HgS <sub>4</sub> <sup>↵</sup>                                     | 0.05@2090 nm <sup>↵</sup>   |

↵

**Figure S1.** The crystal structure of  $\text{Hg}_3\text{O}_2(\text{NO}_3)_2$ .

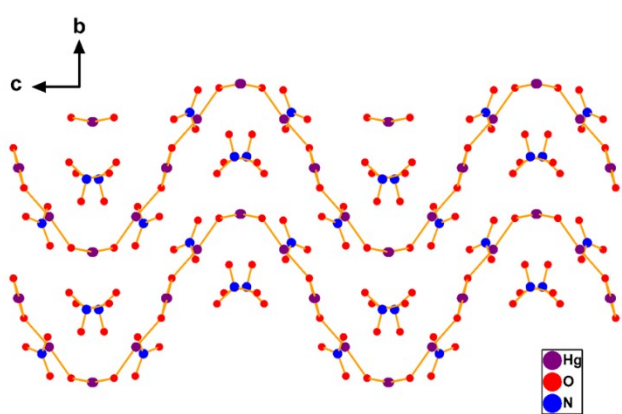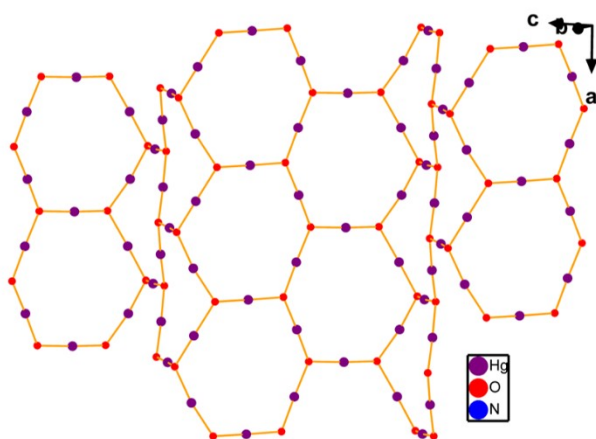

**Figure S2.** Theoretical calculations of  $\text{Hg}_3\text{O}_2(\text{NO}_3)_2$ .

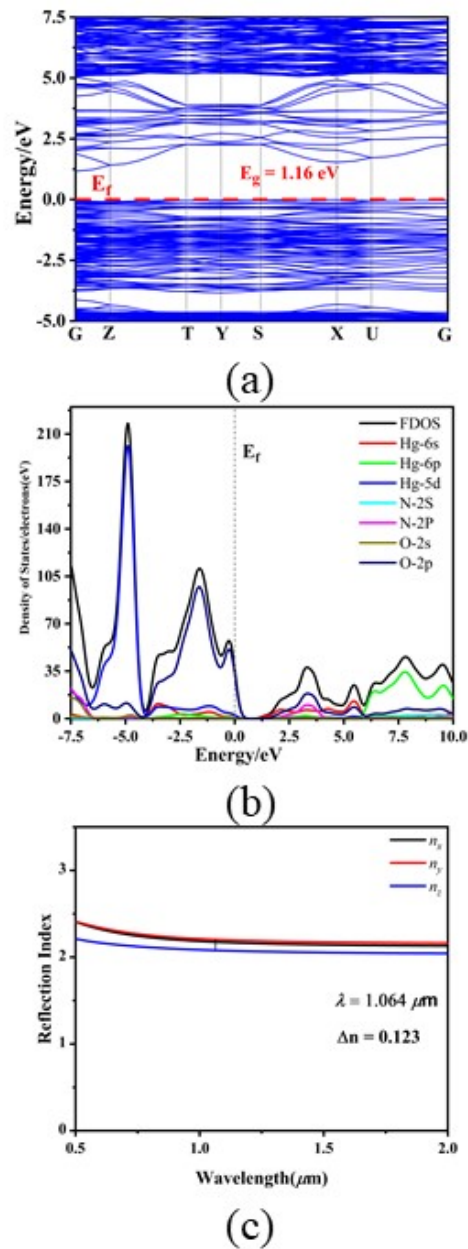

(a) Calculated band gap; (b) Density of states (DOS). the fermi level is set at 0 eV; and (c) Calculated refractive index dispersion curves of  $\text{Hg}_3\text{O}_2(\text{NO}_3)_2$ .



**Figure S3.** The arrangement of  $\text{NO}_3$  groups in  $\text{Hg}_3\text{O}_2(\text{NO}_3)\text{F}$  (a) and  $\text{Hg}_3\text{O}_2(\text{NO}_3)_2$  (b).

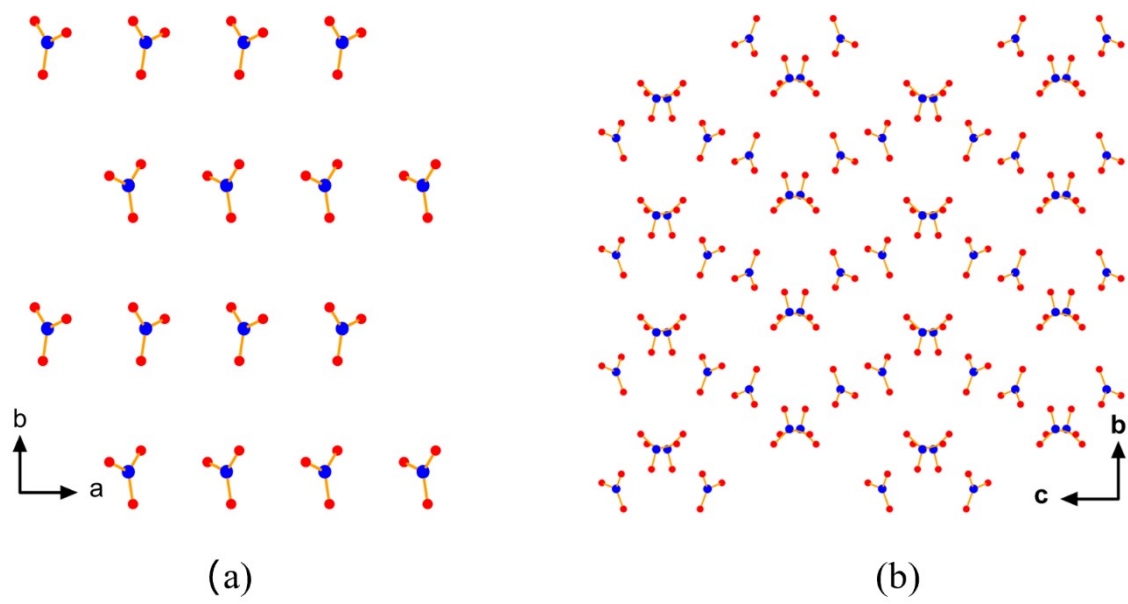

**Figure S4.** EDS images and results of  $\text{Hg}_3\text{O}_2(\text{NO}_3)\text{F}$ .

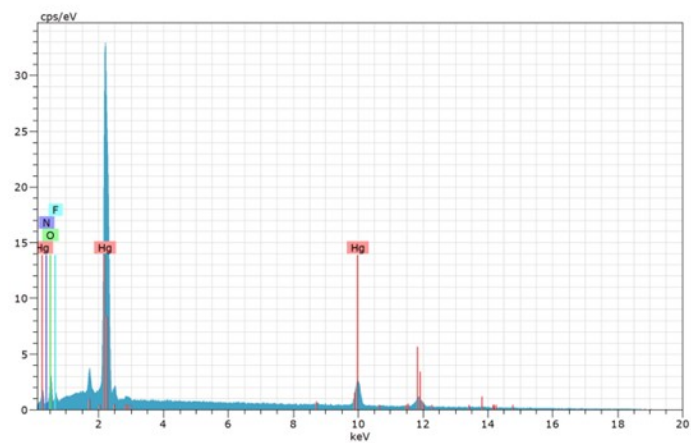

The molar ratio of Hg : O : N : F from the EDS results.

| Compound |                | Molar ratio                                         |
|----------|----------------|-----------------------------------------------------|
| 1        | Hg : O : N : F | 29.89 : 49.93 : 10.05 : 10.13=2.97 : 4.97 : 1 : 1   |
| 2        | Hg : O : N : F | 29.97 : 50.10 : 9.93 : 10=3.01 : 5.04 : 1 : 1       |
| 3        | Hg : O : N : F | 30.08 : 49.94 : 9.89 : 10.09=3.04 : 5.04 : 1 : 1.02 |

## References:

1. M. K. Kim, V. Jo and K. M. Ok, New variant of highly symmetric layered perovskite with coordinated  $\text{NO}_3^-$  ligand: hydrothermal synthesis, structure, and characterization of  $\text{Cs}_2\text{PbCl}_2(\text{NO}_3)_2$ , *Inorg. Chem.*, 2009, **48**, 7368–7372.
2. Leclaire, M. M. Borel, Identification et Structure du Chlorure Nitrate de Calcium Dihydrate, *Acta Cryst*, 1978, **34**, 902–904.
3. L. J. Jouffret, J. M. Hiltbrunner, M. Rivenet, N. Sergent, S. Obbade, D. Avignat, and M. Dubois, L. J. Jouffret, J. M. Hiltbrunner, M. Rivenet, N. Sergent, Saïd Obbade, *Inorg. Chem.*, 2016, **55**, 12185–12192.
4. R. Vaidhyanathan, S. Natarajan, and C. N. R. Rao, Open-Framework Rubidium Halides Incorporated in Cadmium Oxalate Host Lattices, *J. Solid State Chem.*, 2002, **167**, 274–281.
5. M. Bourgault, B. Ducourant, D. Mascherpa-corrall et R. Fourcade, Structure cristalline et moléculaire de  $\text{KSbF}_3\text{NO}_3$ , *J. Fluorine Chem.*, 1981, **17**, 215–224.
6. R. Ouarsal, M. Lachkar, M. Bolte and B. El Bali, Trirubidium cobalt tetrachloride nitrate(V),  $\text{Rb}_3\text{CoCl}_4\text{NO}_3$ , *Acta Crystallogr. E Structure Report*, 2005, **61**, i44–i45.
7. Leclaire and M. M. Borel, Identification et structure du chlorure nitrate de calcium dihydraté, *Acta Cryst. B Structural Crystallography and Crystal Chemistry*, 1978, **34**, 902–904.
8. S. Farhadi and J. Safabakhsh, Solid-state thermal decomposition of the  $[\text{Co}(\text{NH}_3)_5\text{CO}_3]\text{NO}_3 \cdot 0.5\text{H}_2\text{O}$  complex: A simple, rapid and low-temperature synthetic route to  $\text{Co}_3\text{O}_4$  nanoparticles, *J. Alloys Compd.*, 2012, **515**, 180–185.
9. M. Cheng, W. Q. Jin, Z. H. Yang and S. L. Pan, Large optical anisotropy-oriented construction of a carbonate-nitrate chloride compound as a potential ultraviolet birefringent material, *Chem. Sci.*, 2022, **13**, 13482–13488.
10. Z. Chen, H. Zeng, S. J. Han, Z. H. Yang and S. L. Pan, From  $\text{BaCl}_2$  to  $\text{Ba}(\text{NO}_3)\text{Cl}$ : significantly enhanced birefringence derived from  $\pi$ -conjugated  $[\text{NO}_3]$ , *New J. Chem.*, 2021, **45**, 17544–17550.
11. V. M. Miskowski, B. D. Szntarsiero, W. P. Schaefer, G. E. Ansok, and H. B. Gray, Crystal Structure and Polarized Electronic Spectra of a (u-Superoxo) dicobalt(III) Complex:  $[(\text{NH}_3)_5\text{Co}]_2\text{O}_2(\text{NO}_3)_2\text{Cl}_3 \cdot 2\text{H}_2\text{O}$ , *Inorg. Chem.*, 1984, **23**, 172–176.
12. D. T. Tran, P. Y. Zavalij, S. R. J. Oliver,  $\text{Pb}_3\text{F}_5\text{NO}_3$ , a Cationic Layered Material for Anion-Exchange, *J. Am. Chem. Soc.*, 2002, **124**, 3966–3969.
13. M. Bourgault, B. Ducourant, D. M. Corral, R. Fourcade, Structure Cristalline de  $\text{NaSbF}_3\text{NO}_3 \cdot \text{H}_2\text{O}$ . Etude de La Liaison Hydrogene O-H-X (X=Cl, Br,  $\text{NO}_3$ ), *J. Fluorine Chem.*, 1981, **17**, 305–315.
14. M. Bourgault, B. Ducourant, R. Fourcade, Sur un nouveau composé doubleur de fréquence, synthèse, et structure du nitrate-bis-nitratotrifluoroantimonate de potassium  $\text{K}_2\text{SbF}_3(\text{NO}_3)_2 \cdot \text{KNO}_3$ , *J. Solid-State Chem.*, 1983, **50**, 79–85.
15. K. Persson, The Crystal Structure of  $\text{Ag}_2\text{INO}_3$ , *Acta Cryst*, 1979, **35**, 302–306.
16. K. Persson, Structure of Disilver Chloride Nitrate, *Acta Cryst*, 1979, **35**, 1432–1435.
17. N. Buchholz, R. Mattes, The Double Salt  $(\text{NH}_4)_2\text{SiF}_6 \cdot \text{NH}_4\text{NO}_3$ , *Mat. Res. Bull.*, 1988, **23**, 755–758.
18. G. Peng, Y. Yang, Y. H. Tang, M. Luo, T. Yan, Y. Q. Zhou, C. S. Lin, Z. S. Lin and N. Ye, Collaborative enhancement from  $\text{Pb}^{2+}$  and  $\text{F}^-$  in  $\text{Pb}_2(\text{NO}_3)_2(\text{H}_2\text{O})\text{F}_2$  generates the largest second harmonic generation effect among nitrates, *Chem Commun.*, 2017, **53**, 9398–9401.
19. L. Wang, H. M. Wang, D. Zhang, D. J. Gao, J. Bi, L. Huang and G. H. Zou, Centrosymmetric  $\text{RbSnF}_2\text{NO}_3$ . noncentrosymmetric  $\text{Rb}_2\text{SbF}_3(\text{NO}_3)_2$ , *Inorg. Chem. Front.*, 2021, **8**, 3317–3324.
20. L. Wang, F. Yang, X. Y. Zhao, L. Huang, D. J. Gao, J. Bi, X. Wang and G. H. Zou,  $\text{Rb}_3\text{SbF}_3(\text{NO}_3)_3$ : an excellent antimony nitrate nonlinear optical material with a strong second harmonic generation response

- fabricated by a rational multi-component design, *Dalton Trans.*, 2019, **48**, 15144–15150.
21. Y. Long, X. H. Dong, H. M. Zeng, Z. Lin and G. H. Zou, Layered Perovskite-like Nitrate  $\text{Cs}_2\text{Pb}(\text{NO}_3)_2\text{Br}_2$  as a Multifunctional Optical Material, *Inorg. Chem.*, 2022, **61**, 4184–4192.  
Y. V. Kokunov, D. G. Detkov, Y. E. Gorbunova, M. M. Ershova, Y. N. Mikhailov, and Academician Yu. A. Buslaev, Crystal Structure of  $(\text{NH}_4)_2\text{Sn}_2\text{F}_4(\text{NO}_3)_2$ : The First Example of Dimeric  $[\text{Sn}_2\text{F}_4\text{E}_2]$  Complexes in Tin(II) Fluorides, *Dokl. Chem.*, 2001, **378**, 135–138.
  22. K. Penneth, B. Holmbeerg, Structure of Mercury Disilver Diiodide Dinitrate Monohydrate, *Acta Cryst.*, 1982, **38**, 904–907.
  23. M. L. Zhou, Y. Yang, Y. W. Guo, Z. S. Lin, J. Y. Yao, Y. C. Wu and C. T. Chen, Hg-Based Infrared Nonlinear Optical Material  $\text{KHg}_4\text{Ga}_5\text{Se}_{12}$  Exhibits Good Phase-Matchability and Exceptional Second Harmonic Generation Response, *Chem. Mater.*, 2017, **29**, 7993–8002.
  24. M. Yan, Z. D. Sun, W. D. Yao, W. Zhou, W. L. Liu and S. P. Guo, A highly distorted  $\text{HgS}_4$  tetrahedron-induced moderate second-harmonic generation response of  $\text{EuHgGeS}_4$ , *Inorg. Chem. Front.*, 2020, **7**, 2451–2458.
  25. W. H. Xing, N. Z. Wang, C. L. Tang, C. X. Li, Z. S. Lin, J. Y. Yao, W. L. Yin and B. Kang, From  $\text{AgGaS}_2$  to  $\text{AgHgPS}_4$ : vacancy defects and highly distorted  $\text{HgS}_4$  tetrahedra double-induced remarkable second-harmonic generation response, *J. Mater. Chem. C*, 2021, **9**, 1062–1068.
  26. K. Wu, X. Su, S. L. Pan and Z. H. Yang, Synthesis and characterization of mid-infrared transparency compounds: acentric  $\text{BaHgS}_2$  and centric  $\text{Ba}_8\text{Hg}_4\text{S}_5\text{Se}_7$ , *Inorg. Chem.*, 2015, **54**, 2772–2779.
  27. B. L. Wu, C. L. Hu, F. F. Mao, R. L. Tang and J. G. Mao, Highly Polarizable  $\text{Hg}^{2+}$  Induced a Strong Second Harmonic Generation Signal and Large Birefringence in  $\text{LiHgPO}_4$ , *J. Am. Chem. Soc.*, 2019, **141**, 10188–10192.
  28. C. Li, W. L. Yin, P. F. Gong, X. S. Li, M. L. Zhou, A. Mar, Z. S. Lin, J. Y. Yao, Y. C. Wu and C. T. Chen, Trigonal Planar  $[\text{HgSe}_3]^{4-}$  Unit: A New Kind of Basic Functional Group in IR Nonlinear Optical Materials with Large Susceptibility and Physicochemical Stability, *J. Am. Chem. Soc.*, 2016, **138**, 6135–6138.
  29. Y. Huang, Y. Zhang, D. D. Chu, Z. H. Yang, G. M. Li and S. L. Pan,  $\text{HgB}_2\text{S}_4$ : A  $d^{10}$  Metal Thioborate with Giant Birefringence and Wide Band Gap, *Chem. Mater.*, 2023, **35**, 4556–4563.
  30. Y. W. Guo, F. Liang, W. L. Yin, Z. Li, X. Y. Luo, Z. S. Lin, J. Y. Yao, A. Mar and Y. C. Wu,  $\text{BaHgGeSe}_4$  and  $\text{SrHgGeSe}_4$ : Two New Hg-Based Infrared Nonlinear Optical Materials, *Chem. Mater.*, 2019, **31**, 3034–3040.
  31. M. R. Sun and J. Y. Yao,  $\text{Ba}_2\text{HgTe}_5$ : a Hg-based telluride with giant birefringence induced by linear  $[\text{HgTe}_2]$  units, *Inorg. Chem. Front.*, 2022, **9**, 5024–5031.
  32. W. Carrillo-Cabrera, F. Menzel, W. Brockner, Crystal structure of copper mercury tetrathiophosphate,  $\text{CuHgPS}_4$ , *Z. Krist. Cryst. Mater.*, 1992, **202**, 152–153.
  33. G. Zhang, Y. J. Li, K. Jiang, H. Y. Zeng, T. Liu, X. G. Chen, J. G. Qin, Z. S. Lin, P. Z. Fu, Y. C. Wu and C. T. Chen, A new mixed halide,  $\text{Cs}_2\text{HgI}_2\text{Cl}_2$ : molecular engineering for a new nonlinear optical material in the infrared region, *J. Am. Chem. Soc.*, 2012, **134**, 14818–14822.
  34. X. H. Dong, L. Huang, H. M. Zeng, Z. Lin, K. M. Ok and G. H. Zou, High-Performance Sulfate Optical Materials Exhibiting Giant Second Harmonic Generation and Large Birefringence, *Angew. Chem., Int. Ed.*, 2022, **61**, e202116790.
  35. P. F. Li, C. L. Hu, Y. P. Gong, F. Kong and J. G. Mao,  $\text{Hg}_3(\text{Te}_3\text{O}_8)(\text{SO}_4)$ : a new sulfate tellurite with a novel structure and large birefringence explored from  $d^{10}$  metal compounds, *Chem. Commun*, 2021, **57**, 7039–7042.
